# Supplementary material
Source: publisher site journal article supplement (https://www.dovepress.com/article/507274)
Supplement: Supplementary file 1 [file get_supplementary_file.php]

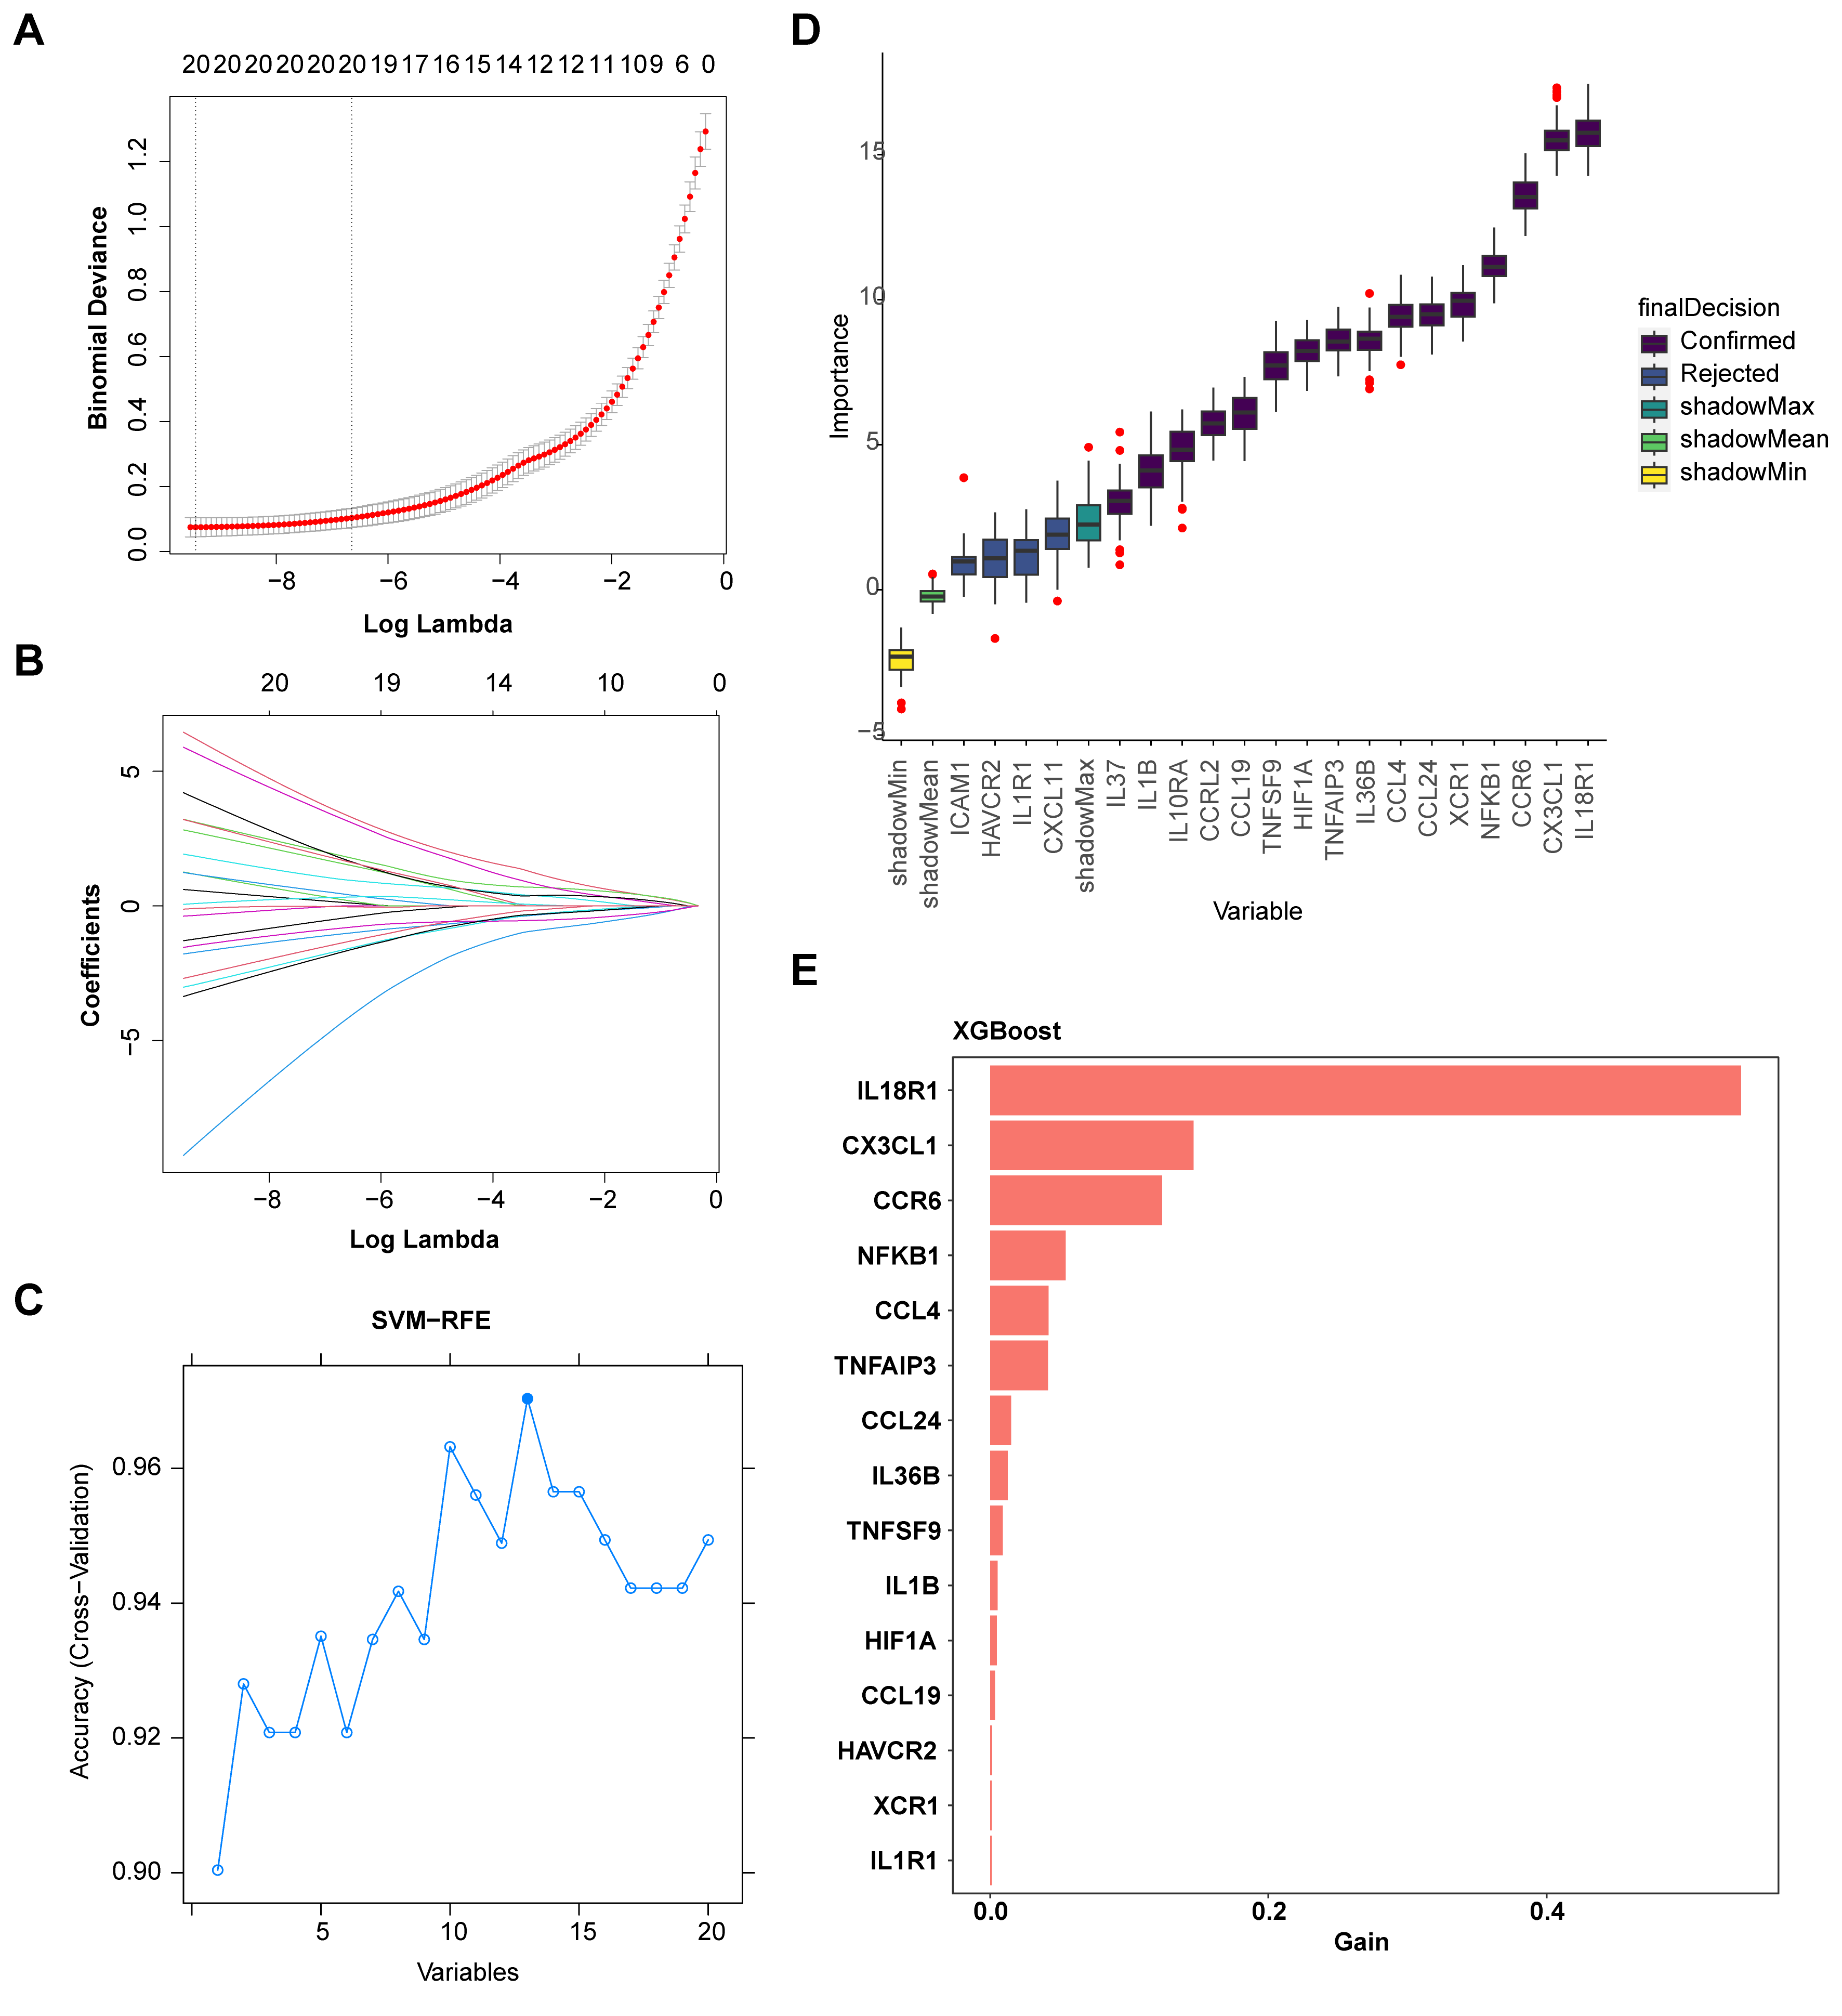


**Figure S1 Common feature genes acquired by four algorithms (LASSO, SVM-RFE, Boruta, and XGBoost).**

A,B: Lasso regression analysis of the top20 gene. C: Predicted accuracy of the number of different characterisation genes. D: Boruta analysis of the top20 gene for gene significance. E: Xgboost screening of top20 for significance of characterised genes.

**
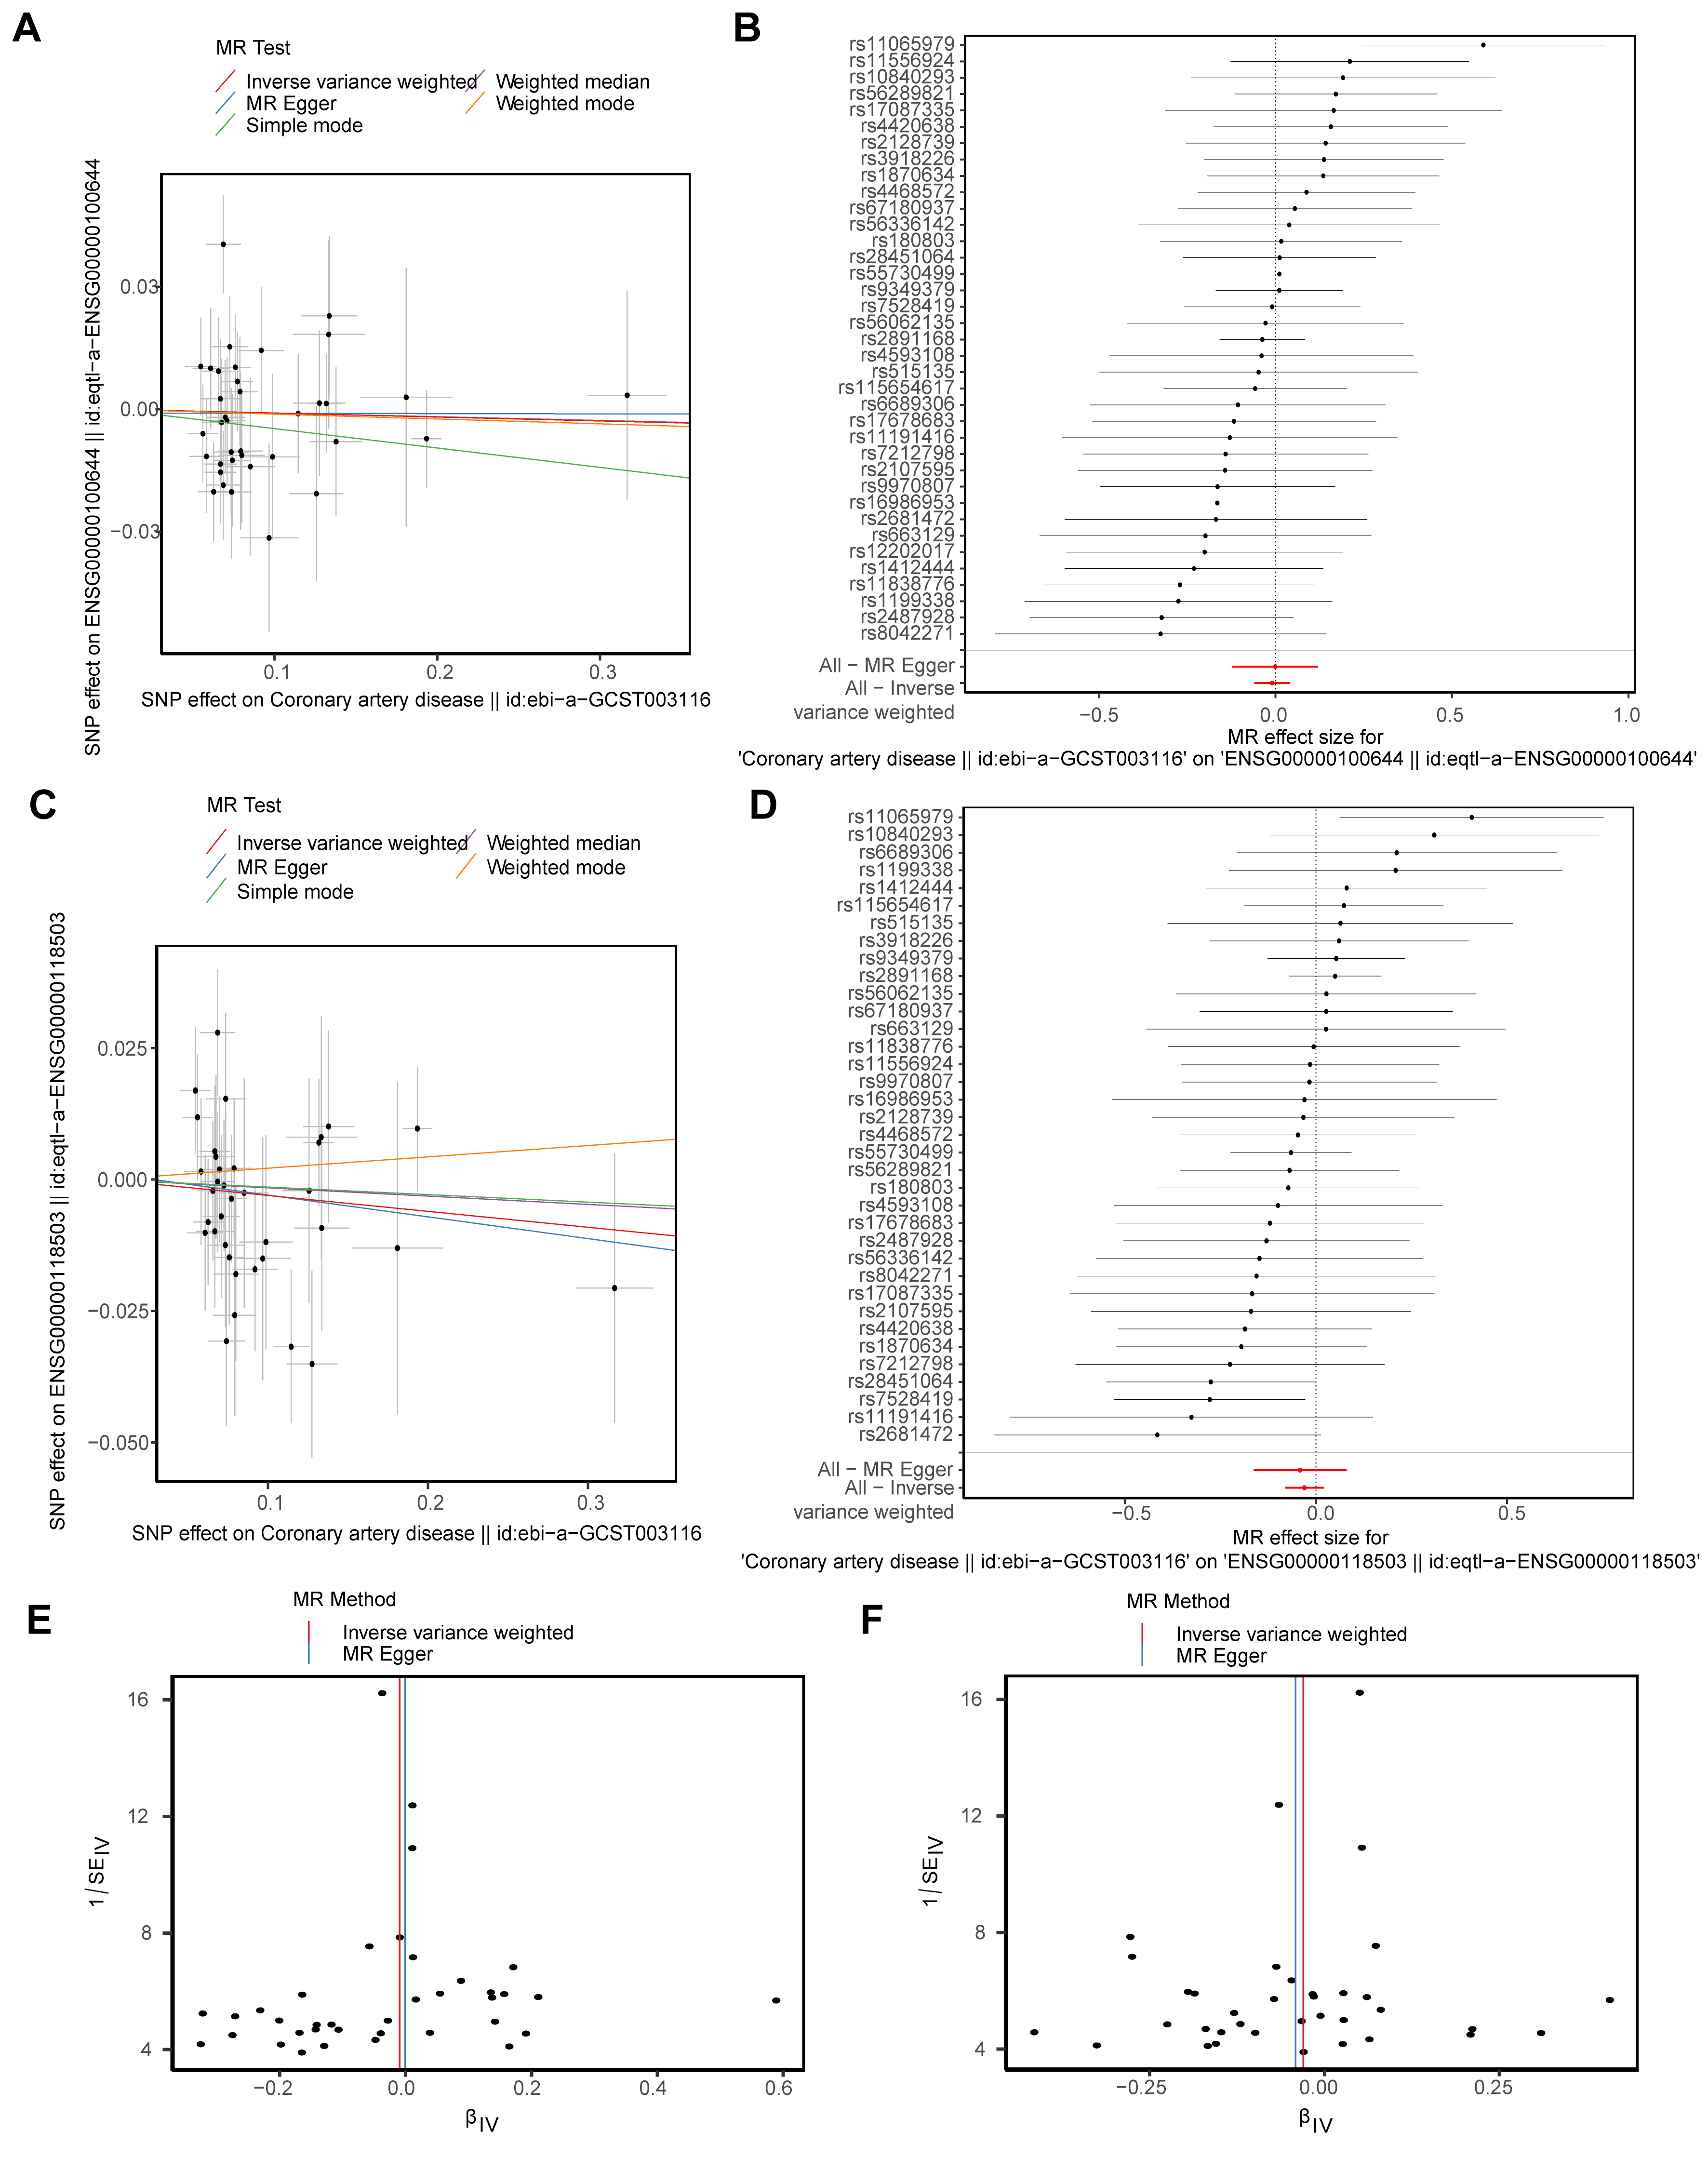
**

**Figure S2 The relationship of CAD with *HIF1A* and *TNFAIP3* in the reverse MR analysis.** A: Scatterplot of reverse MR analysing the effect of instrumental variables (SNPs) on exposure factors (Coronary artery disease) and the effect of instrumental variables (SNPs) on outcome (HIF1A). B: Reverse MR analysis of forest plots of exposure factors on outcome variables. C: Scatterplot of TNFAIP3-Coronary Artery Disease Reverse MR Analysis Instrumental Variable (SNP) on Exposure Factor (TNFAIP3). D: Forest plot of exposure factors on outcome variables for Reverse MR analysis of TNFAIP3-Coronary artery disease. E: Funnel plot of instrumental variables for reverse MR. F: Funnel plot of instrumental variables for positive and negative MR in TNFAIP3-Coronary artery disease.

**Table S1 Primer sequences of *HIF1A, TNFAIP3* and *GAPDH.***

| Primers | Sequences |
| --- | --- |
| HIF1A F | GATCACCCTCTTCGTCGCTT |
| HIF1A R | AAAGGCAAGTCCAGAGGTGG |
| TNFAIP3 F | TCCACAAAGCCCTCATCGAC |
| TNFAIP3 R | TTCGTTTTCAGCGCCACAAG |
| GAPDH F | CGAAGGTGGAGTCAACGGATTT |
| GAPDH R | ATGGGTGGAATCATATTGGAAC |

**Table S2 The top 20 genes screened out via MCC algorithm.**

| **Gene** | **MCC score** | **Rank** |
| --- | --- | --- |
| IL1B | 6216 | 1 |
| CX3CL1 | 6000 | 2 |
| ICAM1 | 5740 | 3 |
| CCL4 | 4637 | 4 |
| CCL19 | 4108 | 5 |
| CXCL11 | 4084 | 6 |
| CCRL2 | 2718 | 7 |
| IL1R1 | 1980 | 8 |
| CCR6 | 1956 | 9 |
| NFKB1 | 1906 | 10 |
| TNFAIP3 | 1711 | 11 |
| CCL24 | 1680 | 12 |
| XCR1 | 486 | 13 |
| HAVCR2 | 482 | 14 |
| IL10RA | 314 | 15 |
| HIF1A | 124 | 16 |
| IL36B | 72 | 17 |
| IL18R1 | 66 | 18 |
| TNFSF9 | 50 | 19 |
| IL37 | 48 | 20 |

**Table S3 SNPs related to *CCR6* obtained** **through screening IVs.**

| **SNP** | **chr** | **pos** | **beta.outcome** | **se.outcome** | **samplesize.outcome** | **pval.outcome** | **eaf.outcome** | **effect_allele.outcome** | **other_allele.outcome** | **outcome** | **id.outcome** | **originalname.outcome** | **outcome.deprecated** | **mr_keep.outcome** | **data_source.outcome** |
| --- | --- | --- | --- | --- | --- | --- | --- | --- | --- | --- | --- | --- | --- | --- | --- |
| rs13098911 | 3 | 46235201 | 0.009609 | 0.0142378 | 42457 | 0.499744 | 0.109364 | T | C | Coronary artery disease || id:ebi-a-GCST003116 | ebi-a-GCST003116 | Coronary artery disease | Coronary artery disease || || | TRUE | igd |
| rs4710155 | 6 | 167394701 | -0.013186 | 0.0201168 | 42457 | 0.512164 | 0.053297 | A | G | Coronary artery disease || id:ebi-a-GCST003116 | ebi-a-GCST003116 | Coronary artery disease | Coronary artery disease || || | TRUE | igd |
| rs12212247 | 6 | 167413539 | 0.004828 | 0.0094561 | 42457 | 0.609651 | 0.420194 | C | T | Coronary artery disease || id:ebi-a-GCST003116 | ebi-a-GCST003116 | Coronary artery disease | Coronary artery disease || || | TRUE | igd |
| rs3752520 | 6 | 167436159 | 0.005475 | 0.0093865 | 42457 | 0.559703 | 0.418725 | C | T | Coronary artery disease || id:ebi-a-GCST003116 | ebi-a-GCST003116 | Coronary artery disease | Coronary artery disease || || | TRUE | igd |
| rs9459872 | 6 | 167500078 | 0.011272 | 0.0095495 | 42457 | 0.237849 | 0.374182 | T | C | Coronary artery disease || id:ebi-a-GCST003116 | ebi-a-GCST003116 | Coronary artery disease | Coronary artery disease || || | TRUE | igd |
| rs2018773 | 6 | 167646957 | 0.00329 | 0.0095125 | 42457 | 0.729449 | 0.55251 | C | T | Coronary artery disease || id:ebi-a-GCST003116 | ebi-a-GCST003116 | Coronary artery disease | Coronary artery disease || || | TRUE | igd |
| rs41299637 | 1 | 200877850 | -0.00779 | 0.0112864 | 42457 | 0.490062 | 0.249377 | G | T | Coronary artery disease || id:ebi-a-GCST003116 | ebi-a-GCST003116 | Coronary artery disease | Coronary artery disease || || | TRUE | igd |
| rs11583546 | 1 | 200902607 | -0.0115 | 0.0113951 | 42457 | 0.312874 | 0.247279 | A | C | Coronary artery disease || id:ebi-a-GCST003116 | ebi-a-GCST003116 | Coronary artery disease | Coronary artery disease || || | TRUE | igd |
| rs6903608 | 6 | 32428285 | 0.012439 | 0.0110898 | 42457 | 0.262007 | 0.634572 | T | C | Coronary artery disease || id:ebi-a-GCST003116 | ebi-a-GCST003116 | Coronary artery disease | Coronary artery disease || || | TRUE | igd |
| rs9273076 | 6 | 32612301 | 0.015318 | 0.018747 | 42457 | 0.413877 | 0.821902 | C | T | Coronary artery disease || id:ebi-a-GCST003116 | ebi-a-GCST003116 | Coronary artery disease | Coronary artery disease || || | TRUE | igd |
| rs10098310 | 8 | 130613614 | 0.004098 | 0.0093322 | 42457 | 0.660572 | 0.57525 | A | G | Coronary artery disease || id:ebi-a-GCST003116 | ebi-a-GCST003116 | Coronary artery disease | Coronary artery disease || || | TRUE | igd |
| rs10946203 | 6 | 167446735 | 0.006063 | 0.0093974 | 42457 | 0.518811 | 0.419071 | C | A | Coronary artery disease || id:ebi-a-GCST003116 | ebi-a-GCST003116 | Coronary artery disease | Coronary artery disease || || | TRUE | igd |
| rs11575078 | 6 | 167544278 | 0.006186 | 0.0101339 | 42457 | 0.541579 | 0.458567 | G | C | Coronary artery disease || id:ebi-a-GCST003116 | ebi-a-GCST003116 | Coronary artery disease | Coronary artery disease || || | TRUE | igd |
| rs67132351 | 6 | 167573370 | -0.003019 | 0.0170328 | 42457 | 0.859315 | 0.11348 | A | C | Coronary artery disease || id:ebi-a-GCST003116 | ebi-a-GCST003116 | Coronary artery disease | Coronary artery disease || || | TRUE | igd |
| rs3093009 | 6 | 167549477 | 0.005161 | 0.0121793 | 42457 | 0.671747 | 0.203382 | G | A | Coronary artery disease || id:ebi-a-GCST003116 | ebi-a-GCST003116 | Coronary artery disease | Coronary artery disease || || | TRUE | igd |
| rs13325613 | 3 | 46298373 | 0.017269 | 0.0152839 | 42457 | 0.258527 | 0.092866 | T | G | Coronary artery disease || id:ebi-a-GCST003116 | ebi-a-GCST003116 | Coronary artery disease | Coronary artery disease || || | TRUE | igd |
| rs3093025 | 6 | 167532731 | -0.001638 | 0.0092529 | 42457 | 0.859489 | 0.562551 | G | A | Coronary artery disease || id:ebi-a-GCST003116 | ebi-a-GCST003116 | Coronary artery disease | Coronary artery disease || || | TRUE | igd |
| rs73033171 | 6 | 167680770 | -0.039554 | 0.0340407 | 42457 | 0.245251 | 0.028477 | C | A | Coronary artery disease || id:ebi-a-GCST003116 | ebi-a-GCST003116 | Coronary artery disease | Coronary artery disease || || | TRUE | igd |
| rs111430388 | 6 | 167374924 | -0.003612 | 0.0141987 | 42457 | 0.799195 | 0.123868 | G | A | Coronary artery disease || id:ebi-a-GCST003116 | ebi-a-GCST003116 | Coronary artery disease | Coronary artery disease || || | TRUE | igd |
| rs1322077 | 6 | 167424293 | 0.005417 | 0.0094083 | 42457 | 0.56477 | 0.422511 | C | T | Coronary artery disease || id:ebi-a-GCST003116 | ebi-a-GCST003116 | Coronary artery disease | Coronary artery disease || || | TRUE | igd |
| rs916331 | 6 | 167470559 | 0.013798 | 0.0095277 | 42457 | 0.147564 | 0.37249 | G | T | Coronary artery disease || id:ebi-a-GCST003116 | ebi-a-GCST003116 | Coronary artery disease | Coronary artery disease || || | TRUE | igd |
| rs10484561 | 6 | 32665420 | 0.021921 | 0.0167917 | 42457 | 0.191733 | 0.112177 | G | T | Coronary artery disease || id:ebi-a-GCST003116 | ebi-a-GCST003116 | Coronary artery disease | Coronary artery disease || || | TRUE | igd |
| rs4648045 | 4 | 103508703 | 0.00952 | 0.0095984 | 42457 | 0.321277 | 0.348475 | C | T | Coronary artery disease || id:ebi-a-GCST003116 | ebi-a-GCST003116 | Coronary artery disease | Coronary artery disease || || | TRUE | igd |

**Table S4 SNPs related to *NFKB1* obtained** **through screening IVs.**

| **SNP** | **chr** | **pos** | **beta.outcome** | **se.outcome** | **samplesize.outcome** | **pval.outcome** | **eaf.outcome** | **effect_allele.outcome** | **other_allele.outcome** | **outcome** | **id.outcome** | **originalname.outcome** | **outcome.deprecated** | **mr_keep.outcome** | **data_source.outcome** |
| --- | --- | --- | --- | --- | --- | --- | --- | --- | --- | --- | --- | --- | --- | --- | --- |
| rs10013613 | 4 | 103423493 | 0.01103 | 0.0095766 | 42457 | 0.249419 | 0.381274 | T | G | Coronary artery disease || id:ebi-a-GCST003116 | ebi-a-GCST003116 | Coronary artery disease | Coronary artery disease || || | TRUE | igd |
| rs141190853 | 4 | 103623564 | -0.00314 | 0.0223035 | 42457 | 0.88804 | 0.06293 | T | C | Coronary artery disease || id:ebi-a-GCST003116 | ebi-a-GCST003116 | Coronary artery disease | Coronary artery disease || || | TRUE | igd |
| rs11097787 | 4 | 103407342 | 0.013274 | 0.0096994 | 42457 | 0.171143 | 0.376027 | T | C | Coronary artery disease || id:ebi-a-GCST003116 | ebi-a-GCST003116 | Coronary artery disease | Coronary artery disease || || | TRUE | igd |
| rs230531 | 4 | 103450377 | -0.011874 | 0.0097885 | 42457 | 0.225106 | 0.664254 | A | G | Coronary artery disease || id:ebi-a-GCST003116 | ebi-a-GCST003116 | Coronary artery disease | Coronary artery disease || || | TRUE | igd |
| rs230544 | 4 | 103500875 | -0.008817 | 0.0093822 | 42457 | 0.347341 | 0.597563 | C | T | Coronary artery disease || id:ebi-a-GCST003116 | ebi-a-GCST003116 | Coronary artery disease | Coronary artery disease || || | TRUE | igd |
| rs4648127 | 4 | 103535905 | -0.010112 | 0.0183244 | 42457 | 0.581064 | 0.067875 | T | C | Coronary artery disease || id:ebi-a-GCST003116 | ebi-a-GCST003116 | Coronary artery disease | Coronary artery disease || || | TRUE | igd |
| rs12502761 | 4 | 103554552 | -0.001603 | 0.0185167 | 42457 | 0.931013 | 0.067708 | C | T | Coronary artery disease || id:ebi-a-GCST003116 | ebi-a-GCST003116 | Coronary artery disease | Coronary artery disease || || | TRUE | igd |
| rs77845705 | 4 | 103601430 | 0.005022 | 0.0262086 | 42457 | 0.848043 | 0.039633 | T | C | Coronary artery disease || id:ebi-a-GCST003116 | ebi-a-GCST003116 | Coronary artery disease | Coronary artery disease || || | TRUE | igd |
| rs77956767 | 4 | 103984111 | 0.013677 | 0.0151025 | 42457 | 0.365142 | 0.106187 | G | A | Coronary artery disease || id:ebi-a-GCST003116 | ebi-a-GCST003116 | Coronary artery disease | Coronary artery disease || || | TRUE | igd |
| rs11726814 | 4 | 104010837 | -0.008558 | 0.0238373 | 42457 | 0.719582 | 0.045163 | A | G | Coronary artery disease || id:ebi-a-GCST003116 | ebi-a-GCST003116 | Coronary artery disease | Coronary artery disease || || | TRUE | igd |
| rs2623060 | 4 | 104047504 | 0.005985 | 0.0094017 | 42457 | 0.524396 | 0.394537 | A | G | Coronary artery disease || id:ebi-a-GCST003116 | ebi-a-GCST003116 | Coronary artery disease | Coronary artery disease || || | TRUE | igd |
| rs78820409 | 4 | 104090735 | -0.002604 | 0.0234104 | 42457 | 0.911432 | 0.047838 | G | A | Coronary artery disease || id:ebi-a-GCST003116 | ebi-a-GCST003116 | Coronary artery disease | Coronary artery disease || || | TRUE | igd |
| rs7310615 | 12 | 111865049 | -0.063685 | 0.0105673 | 42457 | 1.67E-09 | 0.572791 | G | C | Coronary artery disease || id:ebi-a-GCST003116 | ebi-a-GCST003116 | Coronary artery disease | Coronary artery disease || || | TRUE | igd |
| rs113584126 | 4 | 103647848 | -0.025345 | 0.0522923 | 42457 | 0.627904 | 0.011775 | C | T | Coronary artery disease || id:ebi-a-GCST003116 | ebi-a-GCST003116 | Coronary artery disease | Coronary artery disease || || | TRUE | igd |
| rs79666481 | 4 | 103920431 | -0.014184 | 0.0251408 | 42457 | 0.57263 | 0.041626 | C | T | Coronary artery disease || id:ebi-a-GCST003116 | ebi-a-GCST003116 | Coronary artery disease | Coronary artery disease || || | TRUE | igd |
| rs112207659 | 4 | 104211528 | -0.008236 | 0.0353095 | 42457 | 0.815566 | 0.027374 | C | T | Coronary artery disease || id:ebi-a-GCST003116 | ebi-a-GCST003116 | Coronary artery disease | Coronary artery disease || || | TRUE | igd |
| rs28557116 | 4 | 103530642 | 0.010345 | 0.0225881 | 42457 | 0.646964 | 0.045098 | C | A | Coronary artery disease || id:ebi-a-GCST003116 | ebi-a-GCST003116 | Coronary artery disease | Coronary artery disease || || | TRUE | igd |
| rs112623404 | 4 | 103726725 | -0.006434 | 0.0155262 | 42457 | 0.678583 | 0.102176 | A | C | Coronary artery disease || id:ebi-a-GCST003116 | ebi-a-GCST003116 | Coronary artery disease | Coronary artery disease || || | TRUE | igd |
| rs2623070 | 4 | 104037388 | 0.00723 | 0.0094398 | 42457 | 0.44373 | 0.381454 | A | G | Coronary artery disease || id:ebi-a-GCST003116 | ebi-a-GCST003116 | Coronary artery disease | Coronary artery disease || || | TRUE | igd |
| rs79354007 | 4 | 104143810 | -0.007557 | 0.0348163 | 42457 | 0.828167 | 0.027318 | T | C | Coronary artery disease || id:ebi-a-GCST003116 | ebi-a-GCST003116 | Coronary artery disease | Coronary artery disease || || | TRUE | igd |
| rs75054070 | 4 | 104234169 | -0.005254 | 0.0242566 | 42457 | 0.828519 | 0.045018 | A | G | Coronary artery disease || id:ebi-a-GCST003116 | ebi-a-GCST003116 | Coronary artery disease | Coronary artery disease || || | TRUE | igd |
| rs12152655 | 4 | 103573491 | 0.008106 | 0.0235244 | 42457 | 0.730412 | 0.048543 | A | C | Coronary artery disease || id:ebi-a-GCST003116 | ebi-a-GCST003116 | Coronary artery disease | Coronary artery disease || || | TRUE | igd |
| rs61075040 | 4 | 103973961 | 0.000402 | 0.009393 | 42457 | 0.965863 | 0.389076 | A | C | Coronary artery disease || id:ebi-a-GCST003116 | ebi-a-GCST003116 | Coronary artery disease | Coronary artery disease || || | TRUE | igd |

**Table S5 SNPs related to *XCR1* obtained** **through screening IVs.**

| **SNP** | **chr** | **pos** | **beta.outcome** | **se.outcome** | **samplesize.outcome** | **pval.outcome** | **eaf.outcome** | **effect_allele.outcome** | **other_allele.outcome** | **outcome** | **id.outcome** | **originalname.outcome** | **outcome.deprecated** | **mr_keep.outcome** | **data_source.outcome** |
| --- | --- | --- | --- | --- | --- | --- | --- | --- | --- | --- | --- | --- | --- | --- | --- |
| rs7627901 | 3 | 45919392 | 0.027459 | 0.0121913 | 42457 | 0.0243008 | 0.175463 | C | T | Coronary artery disease || id:ebi-a-GCST003116 | ebi-a-GCST003116 | Coronary artery disease | Coronary artery disease || || | TRUE | igd |
| rs3796376 | 3 | 46009491 | 0.023869 | 0.0115004 | 42457 | 0.0379411 | 0.198588 | T | C | Coronary artery disease || id:ebi-a-GCST003116 | ebi-a-GCST003116 | Coronary artery disease | Coronary artery disease || || | TRUE | igd |
| rs60539039 | 3 | 46046469 | 0.015612 | 0.0111007 | 42457 | 0.159605 | 0.228848 | C | A | Coronary artery disease || id:ebi-a-GCST003116 | ebi-a-GCST003116 | Coronary artery disease | Coronary artery disease || || | TRUE | igd |
| rs17078589 | 3 | 46124511 | 0.008987 | 0.0106651 | 42457 | 0.39942 | 0.245484 | C | G | Coronary artery disease || id:ebi-a-GCST003116 | ebi-a-GCST003116 | Coronary artery disease | Coronary artery disease || || | TRUE | igd |
| rs4383561 | 3 | 46320462 | 0.014028 | 0.0140086 | 42457 | 0.316642 | 0.153735 | C | T | Coronary artery disease || id:ebi-a-GCST003116 | ebi-a-GCST003116 | Coronary artery disease | Coronary artery disease || || | TRUE | igd |
| rs61066315 | 3 | 46157052 | 0.013493 | 0.0112506 | 42457 | 0.230405 | 0.210037 | T | C | Coronary artery disease || id:ebi-a-GCST003116 | ebi-a-GCST003116 | Coronary artery disease | Coronary artery disease || || | TRUE | igd |
| rs2172246 | 3 | 46214685 | 0.003707 | 0.0108802 | 42457 | 0.733321 | 0.727743 | A | C | Coronary artery disease || id:ebi-a-GCST003116 | ebi-a-GCST003116 | Coronary artery disease | Coronary artery disease || || | TRUE | igd |
| rs3181077 | 3 | 46250652 | -0.000876 | 0.0110746 | 42457 | 0.936953 | 0.730753 | T | C | Coronary artery disease || id:ebi-a-GCST003116 | ebi-a-GCST003116 | Coronary artery disease | Coronary artery disease || || | TRUE | igd |
| rs3091309 | 3 | 46303184 | -0.004676 | 0.0135698 | 42457 | 0.730404 | 0.822779 | G | A | Coronary artery disease || id:ebi-a-GCST003116 | ebi-a-GCST003116 | Coronary artery disease | Coronary artery disease || || | TRUE | igd |
| rs59647542 | 3 | 45858710 | 0.020338 | 0.0173131 | 42457 | 0.240108 | 0.083221 | T | C | Coronary artery disease || id:ebi-a-GCST003116 | ebi-a-GCST003116 | Coronary artery disease | Coronary artery disease || || | TRUE | igd |
| rs2742361 | 3 | 45870645 | 0.012997 | 0.0129571 | 42457 | 0.315823 | 0.808942 | A | G | Coronary artery disease || id:ebi-a-GCST003116 | ebi-a-GCST003116 | Coronary artery disease | Coronary artery disease || || | TRUE | igd |
| rs11916880 | 3 | 45888757 | 0.018965 | 0.0171458 | 42457 | 0.268683 | 0.081695 | A | C | Coronary artery disease || id:ebi-a-GCST003116 | ebi-a-GCST003116 | Coronary artery disease | Coronary artery disease || || | TRUE | igd |
| rs58035200 | 3 | 46068681 | 0.01437 | 0.0111105 | 42457 | 0.195881 | 0.219472 | T | C | Coronary artery disease || id:ebi-a-GCST003116 | ebi-a-GCST003116 | Coronary artery disease | Coronary artery disease || || | TRUE | igd |
| rs6441976 | 3 | 46438012 | -0.018077 | 0.0207099 | 42457 | 0.382735 | 0.91553 | C | T | Coronary artery disease || id:ebi-a-GCST003116 | ebi-a-GCST003116 | Coronary artery disease | Coronary artery disease || || | TRUE | igd |
| rs34549672 | 3 | 45949954 | 0.014313 | 0.0095669 | 42457 | 0.134627 | 0.429068 | A | C | Coronary artery disease || id:ebi-a-GCST003116 | ebi-a-GCST003116 | Coronary artery disease | Coronary artery disease || || | TRUE | igd |
| rs9850642 | 3 | 46200823 | -0.008493 | 0.0095853 | 42457 | 0.375594 | 0.509117 | C | A | Coronary artery disease || id:ebi-a-GCST003116 | ebi-a-GCST003116 | Coronary artery disease | Coronary artery disease || || | TRUE | igd |
| rs62242981 | 3 | 46381597 | -0.000482 | 0.0138164 | 42457 | 0.97217 | 0.165578 | G | A | Coronary artery disease || id:ebi-a-GCST003116 | ebi-a-GCST003116 | Coronary artery disease | Coronary artery disease || || | TRUE | igd |
| rs35537559 | 3 | 46021452 | 0.016005 | 0.010765 | 42457 | 0.137078 | 0.238055 | G | T | Coronary artery disease || id:ebi-a-GCST003116 | ebi-a-GCST003116 | Coronary artery disease | Coronary artery disease || || | TRUE | igd |
| rs1604068 | 3 | 46101684 | 0.008562 | 0.0107085 | 42457 | 0.423972 | 0.25339 | G | A | Coronary artery disease || id:ebi-a-GCST003116 | ebi-a-GCST003116 | Coronary artery disease | Coronary artery disease || || | TRUE | igd |
| rs62244806 | 3 | 46352908 | -0.000489 | 0.0135426 | 42457 | 0.971196 | 0.169272 | A | T | Coronary artery disease || id:ebi-a-GCST003116 | ebi-a-GCST003116 | Coronary artery disease | Coronary artery disease || || | TRUE | igd |
| rs6441932 | 3 | 45930222 | 0.012364 | 0.0094365 | 42457 | 0.190117 | 0.431614 | G | A | Coronary artery disease || id:ebi-a-GCST003116 | ebi-a-GCST003116 | Coronary artery disease | Coronary artery disease || || | TRUE | igd |
| rs60779624 | 3 | 45971263 | 0.024438 | 0.011268 | 42457 | 0.0300975 | 0.210713 | A | G | Coronary artery disease || id:ebi-a-GCST003116 | ebi-a-GCST003116 | Coronary artery disease | Coronary artery disease || || | TRUE | igd |
| rs3796373 | 3 | 45960851 | 0.011369 | 0.0104413 | 42457 | 0.276221 | 0.270024 | T | C | Coronary artery disease || id:ebi-a-GCST003116 | ebi-a-GCST003116 | Coronary artery disease | Coronary artery disease || || | TRUE | igd |

**Table S6 SNPs related to *HIF1A* obtained** **through screening IVs.**

| **SNP** | **chr** | **pos** | **beta.outcome** | **se.outcome** | **samplesize.outcome** | **pval.outcome** | **eaf.outcome** | **effect_allele.outcome** | **other_allele.outcome** | **outcome** | **id.outcome** | **originalname.outcome** | **outcome.deprecated** | **mr_keep.outcome** | **data_source.outcome** |
| --- | --- | --- | --- | --- | --- | --- | --- | --- | --- | --- | --- | --- | --- | --- | --- |
| rs56330463 | 5 | 148200011 | 0.017502 | 0.0097146 | 42457 | 0.0716044 | 0.588019 | C | T | Coronary artery disease || id:ebi-a-GCST003116 | ebi-a-GCST003116 | Coronary artery disease | Coronary artery disease || || | TRUE | igd |
| rs1091524 | 14 | 61979413 | -0.021214 | 0.0152231 | 42457 | 0.163456 | 0.860703 | G | A | Coronary artery disease || id:ebi-a-GCST003116 | ebi-a-GCST003116 | Coronary artery disease | Coronary artery disease || || | TRUE | igd |
| rs11625047 | 14 | 62139577 | -0.016208 | 0.0245271 | 42457 | 0.508727 | 0.039382 | C | G | Coronary artery disease || id:ebi-a-GCST003116 | ebi-a-GCST003116 | Coronary artery disease | Coronary artery disease || || | TRUE | igd |
| rs3783765 | 14 | 61968118 | -0.013676 | 0.0125031 | 42457 | 0.274038 | 0.813853 | T | C | Coronary artery disease || id:ebi-a-GCST003116 | ebi-a-GCST003116 | Coronary artery disease | Coronary artery disease || || | TRUE | igd |
| rs10151112 | 14 | 62218317 | -0.047031 | 0.0238427 | 42457 | 0.0485467 | 0.058229 | T | A | Coronary artery disease || id:ebi-a-GCST003116 | ebi-a-GCST003116 | Coronary artery disease | Coronary artery disease || || | TRUE | igd |
| rs76629437 | 14 | 62026895 | -0.091207 | 0.0623534 | 42457 | 0.143538 | 0.017438 | A | G | Coronary artery disease || id:ebi-a-GCST003116 | ebi-a-GCST003116 | Coronary artery disease | Coronary artery disease || || | TRUE | igd |
| rs76276969 | 14 | 62173727 | -0.03682 | 0.0217169 | 42457 | 0.0899891 | 0.054802 | C | A | Coronary artery disease || id:ebi-a-GCST003116 | ebi-a-GCST003116 | Coronary artery disease | Coronary artery disease || || | TRUE | igd |
| rs72716792 | 14 | 62333094 | -0.031882 | 0.0445776 | 42457 | 0.474484 | 0.023269 | G | A | Coronary artery disease || id:ebi-a-GCST003116 | ebi-a-GCST003116 | Coronary artery disease | Coronary artery disease || || | TRUE | igd |
| rs6573394 | 14 | 61955220 | 0.011071 | 0.012641 | 42457 | 0.381139 | 0.150875 | G | C | Coronary artery disease || id:ebi-a-GCST003116 | ebi-a-GCST003116 | Coronary artery disease | Coronary artery disease || || | TRUE | igd |
| rs77899560 | 14 | 61944422 | 0.0291 | 0.026188 | 42457 | 0.266484 | 0.033344 | G | A | Coronary artery disease || id:ebi-a-GCST003116 | ebi-a-GCST003116 | Coronary artery disease | Coronary artery disease || || | TRUE | igd |
| rs17256254 | 14 | 61991834 | 0.020079 | 0.0138794 | 42457 | 0.147987 | 0.125748 | C | T | Coronary artery disease || id:ebi-a-GCST003116 | ebi-a-GCST003116 | Coronary artery disease | Coronary artery disease || || | TRUE | igd |
| rs11623578 | 14 | 62055721 | -0.017582 | 0.022411 | 42457 | 0.432732 | 0.059213 | C | A | Coronary artery disease || id:ebi-a-GCST003116 | ebi-a-GCST003116 | Coronary artery disease | Coronary artery disease || || | TRUE | igd |
| rs2181601 | 14 | 62080655 | -0.004998 | 0.0239828 | 42457 | 0.834918 | 0.940094 | G | A | Coronary artery disease || id:ebi-a-GCST003116 | ebi-a-GCST003116 | Coronary artery disease | Coronary artery disease || || | TRUE | igd |
| rs710061 | 14 | 62104827 | 0.005055 | 0.0192456 | 42457 | 0.792815 | 0.90092 | A | G | Coronary artery disease || id:ebi-a-GCST003116 | ebi-a-GCST003116 | Coronary artery disease | Coronary artery disease || || | TRUE | igd |
| rs61993003 | 14 | 62067586 | 0.000957 | 0.0254656 | 42457 | 0.970022 | 0.04002 | G | A | Coronary artery disease || id:ebi-a-GCST003116 | ebi-a-GCST003116 | Coronary artery disease | Coronary artery disease || || | TRUE | igd |
| rs710046 | 14 | 62119993 | 0.009486 | 0.0116938 | 42457 | 0.417251 | 0.786695 | G | A | Coronary artery disease || id:ebi-a-GCST003116 | ebi-a-GCST003116 | Coronary artery disease | Coronary artery disease || || | TRUE | igd |
| rs78369274 | 14 | 62284716 | -0.057741 | 0.0481971 | 42457 | 0.23091 | 0.01967 | G | T | Coronary artery disease || id:ebi-a-GCST003116 | ebi-a-GCST003116 | Coronary artery disease | Coronary artery disease || || | TRUE | igd |
| rs143228053 | 14 | 61943748 | -0.052984 | 0.0390397 | 42457 | 0.174724 | 0.02 | C | T | Coronary artery disease || id:ebi-a-GCST003116 | ebi-a-GCST003116 | Coronary artery disease | Coronary artery disease || || | TRUE | igd |
| rs117883794 | 14 | 62162278 | -0.023845 | 0.0243174 | 42457 | 0.326804 | 0.040153 | A | C | Coronary artery disease || id:ebi-a-GCST003116 | ebi-a-GCST003116 | Coronary artery disease | Coronary artery disease || || | TRUE | igd |
| rs11627975 | 14 | 62092461 | -0.003848 | 0.0218374 | 42457 | 0.860128 | 0.049857 | T | C | Coronary artery disease || id:ebi-a-GCST003116 | ebi-a-GCST003116 | Coronary artery disease | Coronary artery disease || || | TRUE | igd |
| rs17256373 | 14 | 62186631 | -0.013718 | 0.0245249 | 42457 | 0.575922 | 0.03909 | G | A | Coronary artery disease || id:ebi-a-GCST003116 | ebi-a-GCST003116 | Coronary artery disease | Coronary artery disease || || | TRUE | igd |
| rs11621525 | 14 | 62203056 | 0.001373 | 0.0116373 | 42457 | 0.906081 | 0.204004 | A | T | Coronary artery disease || id:ebi-a-GCST003116 | ebi-a-GCST003116 | Coronary artery disease | Coronary artery disease || || | TRUE | igd |
| rs111522409 | 14 | 62150735 | -0.019849 | 0.0243229 | 42457 | 0.414463 | 0.040758 | G | A | Coronary artery disease || id:ebi-a-GCST003116 | ebi-a-GCST003116 | Coronary artery disease | Coronary artery disease || || | TRUE | igd |

**Table S7** **SNPs related to *TNFAIP3* obtained** **through screening IVs.**

| **SNP** | **chr** | **pos** | **beta.outcome** | **se.outcome** | **samplesize.outcome** | **pval.outcome** | **eaf.outcome** | **effect_allele.outcome** | **other_allele.outcome** | **outcome** | **id.outcome** | **originalname.outcome** | **outcome.deprecated** | **mr_keep.outcome** | **data_source.outcome** |
| --- | --- | --- | --- | --- | --- | --- | --- | --- | --- | --- | --- | --- | --- | --- | --- |
| rs56388170 | 7 | 28724374 | 0.009915 | 0.0107346 | 42457 | 0.355669 | 0.302325 | T | G | Coronary artery disease || id:ebi-a-GCST003116 | ebi-a-GCST003116 | Coronary artery disease | Coronary artery disease || || | TRUE | igd |
| rs643746 | 6 | 138052680 | -0.013838 | 0.009544 | 42457 | 0.147084 | 0.419977 | T | C | Coronary artery disease || id:ebi-a-GCST003116 | ebi-a-GCST003116 | Coronary artery disease | Coronary artery disease || || | TRUE | igd |
| rs9376300 | 6 | 138098213 | -0.008622 | 0.0093507 | 42457 | 0.356491 | 0.490957 | A | G | Coronary artery disease || id:ebi-a-GCST003116 | ebi-a-GCST003116 | Coronary artery disease | Coronary artery disease || || | TRUE | igd |
| rs9376297 | 6 | 138078785 | -0.009338 | 0.0093409 | 42457 | 0.317461 | 0.489492 | T | C | Coronary artery disease || id:ebi-a-GCST003116 | ebi-a-GCST003116 | Coronary artery disease | Coronary artery disease || || | TRUE | igd |
| rs111778408 | 14 | 35572163 | -0.016494 | 0.0158282 | 42457 | 0.297381 | 0.103153 | A | G | Coronary artery disease || id:ebi-a-GCST003116 | ebi-a-GCST003116 | Coronary artery disease | Coronary artery disease || || | TRUE | igd |
| rs498361 | 6 | 138034294 | -0.011609 | 0.009544 | 42457 | 0.223847 | 0.372761 | C | T | Coronary artery disease || id:ebi-a-GCST003116 | ebi-a-GCST003116 | Coronary artery disease | Coronary artery disease || || | TRUE | igd |
| rs1561121 | 6 | 138229819 | 0.010973 | 0.0098417 | 42457 | 0.264871 | 0.35003 | A | C | Coronary artery disease || id:ebi-a-GCST003116 | ebi-a-GCST003116 | Coronary artery disease | Coronary artery disease || || | TRUE | igd |
| rs601035 | 6 | 138212720 | -0.005755 | 0.0098069 | 42457 | 0.557318 | 0.623863 | G | A | Coronary artery disease || id:ebi-a-GCST003116 | ebi-a-GCST003116 | Coronary artery disease | Coronary artery disease || || | TRUE | igd |
| rs4149577 | 12 | 6447522 | 0.006995 | 0.009393 | 42457 | 0.456453 | 0.524393 | A | G | Coronary artery disease || id:ebi-a-GCST003116 | ebi-a-GCST003116 | Coronary artery disease | Coronary artery disease || || | TRUE | igd |
| rs9484087 | 6 | 138068063 | -0.011825 | 0.0097222 | 42457 | 0.223875 | 0.433491 | T | C | Coronary artery disease || id:ebi-a-GCST003116 | ebi-a-GCST003116 | Coronary artery disease | Coronary artery disease || || | TRUE | igd |
| rs661561 | 6 | 138197331 | -0.007087 | 0.009758 | 42457 | 0.467672 | 0.631521 | C | A | Coronary artery disease || id:ebi-a-GCST003116 | ebi-a-GCST003116 | Coronary artery disease | Coronary artery disease || || | TRUE | igd |
| rs657597 | 6 | 138146505 | -0.002049 | 0.0101947 | 42457 | 0.840709 | 0.669165 | C | T | Coronary artery disease || id:ebi-a-GCST003116 | ebi-a-GCST003116 | Coronary artery disease | Coronary artery disease || || | TRUE | igd |

**Table S8 SNPs in the reverse MR related to *HIF1A* and *TNFAIP3***

| **pval.exposure** | **chr.exposure** | **beta.exposure** | **se.exposure** | **samplesize.exposure** | **pos.exposure** | **id.exposure** | **SNP** | **effect_allele.exposure** | **other_allele.exposure** | **eaf.exposure** | **exposure** | **mr_keep.exposure** | **pval_origin.exposure** | **data_source.exposure** |
| --- | --- | --- | --- | --- | --- | --- | --- | --- | --- | --- | --- | --- | --- | --- |
| 1.97E-23 | 1 | -0.11453 | 0.011482 | 42457 | 109817192 | ebi-a-GCST003116 | rs7528419 | G | A | 0.21418 | Coronary artery disease || id:ebi-a-GCST003116 | TRUE | reported | igd |
| 5.00E-14 | 1 | -0.12575 | 0.016695 | 42457 | 56965664 | ebi-a-GCST003116 | rs9970807 | T | C | 0.084903 | Coronary artery disease || id:ebi-a-GCST003116 | TRUE | reported | igd |
| 1.01E-12 | 1 | 0.078807 | 0.0110551 | 42457 | 222823743 | ebi-a-GCST003116 | rs67180937 | G | T | 0.663052 | Coronary artery disease || id:ebi-a-GCST003116 | TRUE | reported | igd |
| 2.60E-09 | 1 | -0.056012 | 0.0094061 | 42457 | 154395946 | ebi-a-GCST003116 | rs6689306 | G | A | 0.552455 | Coronary artery disease || id:ebi-a-GCST003116 | TRUE | reported | igd |
| 3.00E-09 | 2 | 0.098786 | 0.0166548 | 42457 | 145286559 | ebi-a-GCST003116 | rs17678683 | G | T | 0.087681 | Coronary artery disease || id:ebi-a-GCST003116 | TRUE | reported | igd |
| 3.12E-18 | 2 | 0.137846 | 0.0158314 | 42457 | 203893999 | ebi-a-GCST003116 | rs115654617 | A | C | 0.106962 | Coronary artery disease || id:ebi-a-GCST003116 | TRUE | reported | igd |
| 3.09E-08 | 2 | 0.067499 | 0.0121924 | 42457 | 21286057 | ebi-a-GCST003116 | rs515135 | C | T | 0.791985 | Coronary artery disease || id:ebi-a-GCST003116 | TRUE | reported | igd |
| 3.62E-10 | 2 | 0.059618 | 0.0095093 | 42457 | 85788175 | ebi-a-GCST003116 | rs7568458 | A | T | 0.448518 | Coronary artery disease || id:ebi-a-GCST003116 | TRUE | reported | igd |
| 1.45E-08 | 2 | 0.08516 | 0.0150265 | 42457 | 19942473 | ebi-a-GCST003116 | rs16986953 | A | G | 0.104706 | Coronary artery disease || id:ebi-a-GCST003116 | TRUE | reported | igd |
| 3.90E-09 | 3 | 0.073596 | 0.0124987 | 42457 | 138087467 | ebi-a-GCST003116 | rs1199338 | C | A | 0.161866 | Coronary artery disease || id:ebi-a-GCST003116 | TRUE | reported | igd |
| 8.82E-10 | 4 | -0.07083 | 0.0115558 | 42457 | 148281001 | ebi-a-GCST003116 | rs4593108 | G | C | 0.204651 | Coronary artery disease || id:ebi-a-GCST003116 | TRUE | reported | igd |
| 4.59E-08 | 4 | 0.060764 | 0.0111159 | 42457 | 57838583 | ebi-a-GCST003116 | rs17087335 | T | G | 0.214637 | Coronary artery disease || id:ebi-a-GCST003116 | TRUE | reported | igd |
| 1.81E-42 | 6 | 0.131836 | 0.0096527 | 42457 | 12903957 | ebi-a-GCST003116 | rs9349379 | G | A | 0.431606 | Coronary artery disease || id:ebi-a-GCST003116 | TRUE | reported | igd |
| 1.98E-11 | 6 | -0.066813 | 0.0099612 | 42457 | 134173151 | ebi-a-GCST003116 | rs12202017 | G | A | 0.300047 | Coronary artery disease || id:ebi-a-GCST003116 | TRUE | reported | igd |
| 1.33E-15 | 6 | 0.246627 | 0.0308579 | 42457 | 160687412 | ebi-a-GCST003116 | rs10080815 | G | T | 0.027558 | Coronary artery disease || id:ebi-a-GCST003116 | TRUE | reported | igd |
| 5.39E-39 | 6 | 0.316641 | 0.0242403 | 42457 | 161005610 | ebi-a-GCST003116 | rs55730499 | T | C | 0.056243 | Coronary artery disease || id:ebi-a-GCST003116 | TRUE | reported | igd |
| 1.85E-08 | 6 | -0.066813 | 0.0118763 | 42457 | 39134099 | ebi-a-GCST003116 | rs56336142 | C | T | 0.192738 | Coronary artery disease || id:ebi-a-GCST003116 | TRUE | reported | igd |
| 7.18E-09 | 6 | 0.081182 | 0.0140293 | 42457 | 160710851 | ebi-a-GCST003116 | rs3127580 | T | C | 0.128173 | Coronary artery disease || id:ebi-a-GCST003116 | TRUE | reported | igd |
| 8.05E-11 | 7 | 0.073415 | 0.0112951 | 42457 | 19049388 | ebi-a-GCST003116 | rs2107595 | A | G | 0.20047 | Coronary artery disease || id:ebi-a-GCST003116 | TRUE | reported | igd |
| 5.34E-11 | 7 | -0.072569 | 0.0110605 | 42457 | 129663496 | ebi-a-GCST003116 | rs11556924 | T | C | 0.313325 | Coronary artery disease || id:ebi-a-GCST003116 | TRUE | reported | igd |
| 1.69E-09 | 7 | 0.133315 | 0.0221275 | 42457 | 150690176 | ebi-a-GCST003116 | rs3918226 | T | C | 0.064515 | Coronary artery disease || id:ebi-a-GCST003116 | TRUE | reported | igd |
| 2.29E-98 | 9 | 0.193401 | 0.0091877 | 42457 | 22098619 | ebi-a-GCST003116 | rs2891168 | G | A | 0.488668 | Coronary artery disease || id:ebi-a-GCST003116 | TRUE | reported | igd |
| 5.15E-12 | 10 | 0.066812 | 0.0096809 | 42457 | 91002927 | ebi-a-GCST003116 | rs1412444 | T | C | 0.369131 | Coronary artery disease || id:ebi-a-GCST003116 | TRUE | reported | igd |
| 5.55E-15 | 10 | 0.075878 | 0.0097113 | 42457 | 44480811 | ebi-a-GCST003116 | rs1870634 | G | T | 0.637485 | Coronary artery disease || id:ebi-a-GCST003116 | TRUE | reported | igd |
| 4.65E-09 | 10 | -0.079249 | 0.0135252 | 42457 | 104604916 | ebi-a-GCST003116 | rs11191416 | G | T | 0.12747 | Coronary artery disease || id:ebi-a-GCST003116 | TRUE | reported | igd |
| 4.41E-11 | 10 | 0.062633 | 0.0095049 | 42457 | 30323892 | ebi-a-GCST003116 | rs2487928 | A | G | 0.418221 | Coronary artery disease || id:ebi-a-GCST003116 | TRUE | reported | igd |
| 1.28E-08 | 11 | 0.054714 | 0.009619 | 42457 | 9751196 | ebi-a-GCST003116 | rs10840293 | A | G | 0.549821 | Coronary artery disease || id:ebi-a-GCST003116 | TRUE | reported | igd |
| 7.05E-11 | 11 | -0.065565 | 0.0100568 | 42457 | 103673277 | ebi-a-GCST003116 | rs2128739 | C | A | 0.676464 | Coronary artery disease || id:ebi-a-GCST003116 | TRUE | reported | igd |
| 1.93E-10 | 12 | 0.068556 | 0.0107672 | 42457 | 112059557 | ebi-a-GCST003116 | rs11065979 | T | C | 0.365499 | Coronary artery disease || id:ebi-a-GCST003116 | TRUE | reported | igd |
| 6.17E-11 | 12 | 0.074114 | 0.0113331 | 42457 | 90008959 | ebi-a-GCST003116 | rs2681472 | G | A | 0.201306 | Coronary artery disease || id:ebi-a-GCST003116 | TRUE | reported | igd |
| 1.83E-10 | 13 | 0.068566 | 0.0107552 | 42457 | 111040681 | ebi-a-GCST003116 | rs11838776 | A | G | 0.263277 | Coronary artery disease || id:ebi-a-GCST003116 | TRUE | reported | igd |
| 1.38E-08 | 14 | 0.05538 | 0.0097569 | 42457 | 100145710 | ebi-a-GCST003116 | rs10139550 | G | C | 0.423033 | Coronary artery disease || id:ebi-a-GCST003116 | TRUE | reported | igd |
| 4.44E-16 | 15 | 0.077234 | 0.0095277 | 42457 | 79124475 | ebi-a-GCST003116 | rs4468572 | C | T | 0.585831 | Coronary artery disease || id:ebi-a-GCST003116 | TRUE | reported | igd |
| 3.68E-08 | 15 | -0.096711 | 0.0175662 | 42457 | 89574218 | ebi-a-GCST003116 | rs8042271 | A | G | 0.097718 | Coronary artery disease || id:ebi-a-GCST003116 | TRUE | reported | igd |
| 4.52E-09 | 15 | -0.069743 | 0.0118937 | 42457 | 67455630 | ebi-a-GCST003116 | rs56062135 | T | C | 0.205729 | Coronary artery disease || id:ebi-a-GCST003116 | TRUE | reported | igd |
| 3.57E-09 | 15 | 0.076551 | 0.012968 | 42457 | 79139370 | ebi-a-GCST003116 | rs56225615 | T | C | 0.156499 | Coronary artery disease || id:ebi-a-GCST003116 | TRUE | reported | igd |
| 1.88E-08 | 17 | 0.079961 | 0.0142216 | 42457 | 59013488 | ebi-a-GCST003116 | rs7212798 | C | T | 0.146516 | Coronary artery disease || id:ebi-a-GCST003116 | TRUE | reported | igd |
| 3.20E-08 | 18 | 0.058163 | 0.0105173 | 42457 | 57838401 | ebi-a-GCST003116 | rs663129 | A | G | 0.256835 | Coronary artery disease || id:ebi-a-GCST003116 | TRUE | reported | igd |

**Table S9 The relationship of CAD with *HIF1A* in the reverse MR analysis.**

| **id.exposure** | **id.outcome** | **outcome** | **exposure** | **method** | **nsnp** | **b** | **se** | **pval** | **lo_ci** | **up_ci** | **or** | **or_lci95** | **or_uci95** |
| --- | --- | --- | --- | --- | --- | --- | --- | --- | --- | --- | --- | --- | --- |
| ebi-a-GCST003116 | eqtl-a-ENSG00000100644 | ENSG00000100644 || id:eqtl-a-ENSG00000100644 | Coronary artery disease || id:ebi-a-GCST003116 | MR Egger | 37 | -0.000692848 | 0.061796247 | 0.991118118 | -0.121813492 | 0.120427796 | 0.999307392 | 0.885313471 | 1.127979293 |
| ebi-a-GCST003116 | eqtl-a-ENSG00000100644 | ENSG00000100644 || id:eqtl-a-ENSG00000100644 | Coronary artery disease || id:ebi-a-GCST003116 | Weighted median | 37 | -0.00917843 | 0.037755176 | 0.807924924 | -0.083178576 | 0.064821716 | 0.990863563 | 0.92018681 | 1.066968784 |
| ebi-a-GCST003116 | eqtl-a-ENSG00000100644 | ENSG00000100644 || id:eqtl-a-ENSG00000100644 | Coronary artery disease || id:ebi-a-GCST003116 | Inverse variance weighted | 37 | -0.009551281 | 0.025655491 | 0.709677007 | -0.059836043 | 0.040733482 | 0.990494188 | 0.941918955 | 1.04157447 |
| ebi-a-GCST003116 | eqtl-a-ENSG00000100644 | ENSG00000100644 || id:eqtl-a-ENSG00000100644 | Coronary artery disease || id:ebi-a-GCST003116 | Simple mode | 37 | -0.047458061 | 0.060999824 | 0.441650549 | -0.167017715 | 0.072101593 | 0.953650468 | 0.846184621 | 1.074764527 |
| ebi-a-GCST003116 | eqtl-a-ENSG00000100644 | ENSG00000100644 || id:eqtl-a-ENSG00000100644 | Coronary artery disease || id:ebi-a-GCST003116 | Weighted mode | 37 | -0.01191877 | 0.041959269 | 0.777995132 | -0.094158936 | 0.070321397 | 0.988151978 | 0.910138097 | 1.072852937 |

**Table S10 The relationship of CAD with *TNFAIP3* in the reverse MR analysis.**

| **id.exposure** | **id.outcome** | **outcome** | **exposure** | **method** | **nsnp** | **b** | **se** | **pval** | **lo_ci** | **up_ci** | **or** | **or_lci95** | **or_uci95** |
| --- | --- | --- | --- | --- | --- | --- | --- | --- | --- | --- | --- | --- | --- |
| ebi-a-GCST003116 | eqtl-a-ENSG00000118503 | ENSG00000118503 || id:eqtl-a-ENSG00000118503 | Coronary artery disease || id:ebi-a-GCST003116 | MR Egger | 36 | -0.041400413 | 0.062073263 | 0.509298729 | -0.163064008 | 0.080263182 | 0.959444879 | 0.849536809 | 1.083572207 |
| ebi-a-GCST003116 | eqtl-a-ENSG00000118503 | ENSG00000118503 || id:eqtl-a-ENSG00000118503 | Coronary artery disease || id:ebi-a-GCST003116 | Weighted median | 36 | -0.015771211 | 0.037793068 | 0.676455831 | -0.089845625 | 0.058303203 | 0.984352504 | 0.914072285 | 1.060036354 |
| ebi-a-GCST003116 | eqtl-a-ENSG00000118503 | ENSG00000118503 || id:eqtl-a-ENSG00000118503 | Coronary artery disease || id:ebi-a-GCST003116 | Inverse variance weighted | 36 | -0.030261164 | 0.025868634 | 0.242080906 | -0.080963687 | 0.020441359 | 0.970192121 | 0.922227179 | 1.020651714 |
| ebi-a-GCST003116 | eqtl-a-ENSG00000118503 | ENSG00000118503 || id:eqtl-a-ENSG00000118503 | Coronary artery disease || id:ebi-a-GCST003116 | Simple mode | 36 | -0.01431611 | 0.073058194 | 0.845778768 | -0.15751017 | 0.128877949 | 0.985785878 | 0.854268126 | 1.137551276 |
| ebi-a-GCST003116 | eqtl-a-ENSG00000118503 | ENSG00000118503 || id:eqtl-a-ENSG00000118503 | Coronary artery disease || id:ebi-a-GCST003116 | Weighted mode | 36 | 0.021566898 | 0.047490175 | 0.652536278 | -0.071513845 | 0.114647641 | 1.021801145 | 0.930983388 | 1.121478205 |
